# Supplementary material for: Understanding covid-19 outcomes among people with intellectual disabilities in England
Source: PubMed Central journal article supplement (PMC10601171; doi:10.1186/s12889-023-16993-x), 2023-10-25
Supplement: 12889_2023_16993_MOESM2_ESM.pdf [file 12889_2023_16993_MOESM2_ESM.pdf]

## CVD-COVID-UK / COVID-IMPACT Consortium Members (05/09/2023)

| Institution                                     | Member Name         |
|-------------------------------------------------|---------------------|
| Addenbrooke's Hospital                          | Jon Boyle           |
| Barts Health NHS Trust                          | Alastair Proudfoot  |
| Barts Health NHS Trust                          | Nida Ahmed          |
| British Heart Foundation                        | Dan O'Connell       |
| British Heart Foundation                        | Naomi Herz          |
| British Heart Foundation                        | Nilesh Samani       |
| British Heart Foundation                        | Sonya Babu-Narayan  |
| British Heart Foundation                        | Zainab Karim        |
| Cancer Research UK                              | Jon Shelton         |
| Cancer Research UK                              | Martina Slapkova    |
| Cancer Research UK                              | Rosie Hinchliffe    |
| Cancer Research UK                              | Shane Johnson       |
| Cardiff University                              | Julia Townson       |
| European Bioinformatics Institute               | Ewan Birney         |
| European Bioinformatics Institute               | Moritz Gerstung     |
| Great Ormond Street Hospital                    | Katherine Brown     |
| Guy's and St Thomas' NHS Foundation Trust       | Benjamin Zuckerman  |
| Guy's and St Thomas' NHS Foundation Trust       | Ernest Wong         |
| Guy's and St Thomas' NHS Foundation Trust       | Tasanee Braithwaite |
| Health Data Research UK/BHF Data Science Centre | Anna Stevenson      |
| Health Data Research UK/BHF Data Science Centre | Annette Jackson     |
| Health Data Research UK/BHF Data Science Centre | Cathie Sudlow       |
| Health Data Research UK/BHF Data Science Centre | Fionna Chalmers     |
| Health Data Research UK/BHF Data Science Centre | James Farrell       |
| Health Data Research UK/BHF Data Science Centre | Jemma Austin        |
| Health Data Research UK/BHF Data Science Centre | John Nolan          |
| Health Data Research UK/BHF Data Science Centre | Kate McAllister     |
| Health Data Research UK/BHF Data Science Centre | Lars Murdock        |
| Health Data Research UK/BHF Data Science Centre | Lynn Morrice        |
| Health Data Research UK/BHF Data Science Centre | Mehrdad Mizani      |
| Health Data Research UK/BHF Data Science Centre | Ross Forsyth        |
| Health Data Research UK/BHF Data Science Centre | Rouven Priedon      |
| Health Data Research UK/BHF Data Science Centre | Samaira Khan        |

| Institution                                     | Member Name        |
|-------------------------------------------------|--------------------|
| Health Data Research UK/BHF Data Science Centre | Steffen Petersen   |
| Health Data Research UK/BHF Data Science Centre | Thomas Bolton      |
| Health Data Research UK/BHF Data Science Centre | Zach Welshman      |
| Healthcare Quality Improvement Partnership      | Caroline Rogers    |
| Healthcare Quality Improvement Partnership      | Mirek Skrypak      |
| Imperial College London                         | Alun Davies        |
| Imperial College London                         | Arunashis Sau      |
| Imperial College London                         | Costas Kallis      |
| Imperial College London                         | Fu Siong Ng        |
| Imperial College London                         | Hannah Whittaker   |
| Imperial College London                         | Ioanna Tzoulaki    |
| Imperial College London                         | Jennifer Quint     |
| Imperial College London                         | Juliette Unwin     |
| Imperial College London                         | Libor Pastika      |
| Imperial College London                         | Petter Brodin      |
| Imperial College London                         | Philip Stone       |
| Imperial College London                         | Safa Salim         |
| Imperial College London                         | Sam Quill          |
| Imperial College London                         | Sarah Cook         |
| Imperial College London                         | Sarah Onida        |
| Imperial College London (LCP)                   | Alistair Marsland  |
| Imperial College London (LCP)                   | Andrew Thompson    |
| Imperial College London (LCP)                   | Sara Holloway      |
| Imperial College London (LCP)                   | Thomas Porter      |
| INSIGHT                                         | Alastair Denniston |
| Keele University                                | Mamas Mamas        |
| King's College London                           | Gayana Perera      |
| King's College London                           | Sarah Martin       |
| King's College London                           | Abdel Douiri       |
| King's College London                           | Adejoke Oluyase    |
| King's College London                           | Ajay Shah          |
| King's College London                           | Alexandru Dregan   |
| King's College London                           | Anna Bone          |

| Institution                                    | Member Name            |
|------------------------------------------------|------------------------|
| King's College London                          | Antonio Cannata        |
| King's College London                          | Ben Bray               |
| King's College London                          | Charles Wolfe          |
| King's College London                          | Daniel Bromage         |
| King's College London                          | Dominic Oliver         |
| King's College London                          | Elena Nikiphorou       |
| King's College London                          | Gareth Williams        |
| King's College London                          | Harry Watson           |
| King's College London                          | Irene Higginson        |
| King's College London                          | Javiera Leniz Martelli |
| King's College London                          | Jayati Das-Munshi      |
| King's College London                          | Joanna Davies          |
| King's College London                          | Johnny Downs           |
| King's College London                          | Katherine Sleeman      |
| King's College London                          | Mevhibe Hocaoglu       |
| King's College London                          | Rachel Cripps          |
| King's College London                          | Richard Killick        |
| King's College London                          | Theresa McDonagh       |
| King's College London                          | Vasa Curcin            |
| Leeds Teaching Hospitals NHS Trust             | Carin van Doorn        |
| London School of Economics & Political Science | Rocco Friebe           |
| London School of Hygiene & Tropical Medicine   | Arturo de la Cruz      |
| London School of Hygiene & Tropical Medicine   | Dorothea Nitsch        |
| London School of Hygiene & Tropical Medicine   | Patrick Bidulka        |
| London School of Hygiene & Tropical Medicine   | Qiuju Li               |
| Manchester University NHS Foundation Trust     | Martin Rutter          |
| NHS England                                    | Adam Hollings          |
| NHS England                                    | Angeliki Antonarou     |
| NHS England                                    | Badar Ahmed            |
| NHS England                                    | Deborah Lowe           |
| NHS England                                    | Efosa Omigie           |
| NHS England                                    | Jake Kasan             |
| NHS England                                    | Joshua Day             |

Institutions party to the Data Sharing Agreement with NHS England for access to the data in the Secure Data Environment service for England for CVD-COVID-UK/COVID-IMPACT are: Imperial College London, King's College London, Swansea University, University College London, University of Bristol, University of Cambridge, University of Glasgow, University of Leicester, University of Liverpool, University of Manchester, University of Oxford, University of Sheffield, University of Southampton.

## CVD-COVID-UK / COVID-IMPACT Consortium Members (05/09/2023)

| Institution                                      | Member Name         |
|--------------------------------------------------|---------------------|
| NHS England                                      | Liam Beckingham     |
| NHS England                                      | Russell Healey      |
| NHS England                                      | Sam Hollings        |
| NHS England                                      | Shoaib Ali Ajaib    |
| NHS England                                      | Steve Ball          |
| NHS Lanarkshire                                  | Mark Barber         |
| NHS Scotland                                     | Carole Morris       |
| NICE                                             | Felix Greaves       |
| NICE                                             | Jennifer Beveridge  |
| NICE                                             | Seamus Kent         |
| NICE                                             | Thomas Lawrence     |
| NICE                                             | Vandana Ayyar-Gupta |
| Office for National Statistics                   | Ben Humberstone     |
| Office for National Statistics                   | Camille Harrison    |
| Office for National Statistics                   | Myer Glickman       |
| Office for National Statistics                   | Vahé Nafilyan       |
| Queen Mary University of London                  | Deepti Gurdasani    |
| Queen's University Belfast                       | Frank Kee           |
| Queen's University Belfast                       | Raymond Carragher   |
| Royal Brompton and Harefield Hospitals           | Paz Tayal           |
| Royal College of Surgeons of England             | David Cromwell      |
| Royal Papworth Hospital NHS Foundation Trust     | Florian Falter      |
| Royal Papworth Hospital NHS Foundation Trust     | Joseph Newman       |
| Royal United Hospitals Bath NHS Foundation Trust | Jennifer Rossdale   |
| St George's University of London                 | Elijah Behr         |
| St George's University of London                 | Nuria Sanchez       |
| St George's University of London                 | Xinkai Wang         |
| Swansea Bay University Health Board              | Daniel Harris       |
| Swansea University                               | Amanda Marchant     |
| Swansea University                               | Ashley Akbari       |
| Swansea University                               | Daniel King         |
| Swansea University                               | David Powell        |
| Swansea University                               | Elizabeth A Ellins  |

| Institution                   | Member Name              |
|-------------------------------|--------------------------|
| Swansea University            | Fatemeh Torabi           |
| Swansea University            | Gareth Davies            |
| Swansea University            | Hoda Abbasizanjani       |
| Swansea University            | Huw Strafford            |
| Swansea University            | Jane Lyons               |
| Swansea University            | Julian Halcox            |
| Swansea University            | Laura North              |
| Swansea University            | Marcos del Pozo Banos    |
| Swansea University            | Owen Pickrell            |
| Swansea University            | Ronan Lyons              |
| Swansea University            | Rowena Griffiths         |
| Swansea University - DATAMIND | Ann John                 |
| University College            | Robert Aldridge          |
| University College London     | Abraham Olvera-Barrios   |
| University College London     | Adnan Tufail             |
| University College London     | Alasdair Warwick         |
| University College London     | Alex Handy               |
| University College London     | Alvina Lai               |
| University College London     | Ami Banerjee             |
| University College London     | Ana Torralbo             |
| University College London     | Ana-Catarina Pinho-Gomes |
| University College London     | Andrew Lambarth          |
| University College London     | Anthony Khawaja          |
| University College London     | Ashkan Dashtban          |
| University College London     | Becky White              |
| University College London     | Christina Pagel          |
| University College London     | Christopher Tomlinson    |
| University College London     | David Selby              |
| University College London     | Eloise Withnell          |
| University College London     | Emma Whitfield           |
| University College London     | Eva Keller               |
| University College London     | Evaleen Malgapo          |
| University College London     | Flavien Hardy            |

| Institution               | Member Name        |
|---------------------------|--------------------|
| University College London | Florian Schmidt    |
| University College London | Freya Allery       |
| University College London | Harry Hemingway    |
| University College London | Honghan Wu         |
| University College London | Jinge Wu           |
| University College London | Johan Thygesen     |
| University College London | Johannes Heyl      |
| University College London | Kate Cheema        |
| University College London | Katie Harron       |
| University College London | Ken Li             |
| University College London | Kerrie Stevenson   |
| University College London | Laura Pasea        |
| University College London | Louise Choo        |
| University College London | Luca Grieco        |
| University College London | Manuel Gomes       |
| University College London | Matt Sydes         |
| University College London | Mehrdad Mizani     |
| University College London | Mel Ramasawmy      |
| University College London | Michalis Katsoulis |
| University College London | Mohamed Mohamed    |
| University College London | Nushrat Khan       |
| University College London | Paula Lorgelly     |
| University College London | Pedro Machado      |
| University College London | Pia Hardelid       |
| University College London | Qi Huang           |
| University College London | Ravi Shankar       |
| University College London | Riyaz Patel        |
| University College London | Roy Schwartz       |
| University College London | Ruth Gilbert       |
| University College London | Samuel Kim         |
| University College London | <b>Sonya Crowe</b> |
| University College London | Spiros Denaxas     |
| University College London | Tuankasfee Hama    |

Institutions party to the Data Sharing Agreement with NHS England for access to the data in the Secure Data Environment service for England for CVD-COVID-UK/COVID-IMPACT are: Imperial College London, King's College London, Swansea University, University College London, University of Bristol, University of Cambridge, University of Glasgow, University of Leicester, University of Liverpool, University of Manchester, University of Oxford, University of Sheffield, University of Southampton.

## CVD-COVID-UK / COVID-IMPACT Consortium Members (05/09/2023)

| Institution                                      | Member Name                  |
|--------------------------------------------------|------------------------------|
| University College London                        | Waty Lilaonitkul             |
| University College London                        | Yat Yi Fan                   |
| University College London                        | Yi Mu                        |
| University College London                        | Yoryos Lyratzopoulos         |
| University College London / DATAMIND             | David Osborn                 |
| University Hospital Bristol NHS Foundation Trust | Serban Stoica                |
| University Hospital of North Midlands            | Arun Pherwani                |
| University of Aberdeen                           | Mary Joan Macleod            |
| University of Birmingham                         | Sarah Wang                   |
| University of Brighton                           | Ravina Barrett               |
| University of Bristol                            | Arun Karthikeyan Suseeladevi |
| University of Bristol                            | Ben Gibbison                 |
| University of Bristol                            | Dann Mitchell                |
| University of Bristol                            | Deborah Lawler               |
| University of Bristol                            | Elsie Horne                  |
| University of Bristol                            | Gianni Angelini              |
| University of Bristol                            | Jeremy Chan                  |
| University of Bristol                            | John Macleod                 |
| University of Bristol                            | Jonathan Sterne              |
| University of Bristol                            | Katharine Looker             |
| University of Bristol                            | Kurt Taylor                  |
| University of Bristol                            | Livia Pierotti               |
| University of Bristol                            | Luisa Zuccolo                |
| University of Bristol                            | Martha Elwenspoek            |
| University of Bristol                            | Marwa Al Arab                |
| University of Bristol                            | Massimo Caputo               |
| University of Bristol                            | Mira Hidajat                 |
| University of Bristol                            | Neil Davies                  |
| University of Bristol                            | Rachel Denholm               |
| University of Bristol                            | Rochelle Knight              |
| University of Bristol                            | Rupert Payne                 |
| University of Bristol                            | Shubhra Sinha                |

| Institution             | Member Name              |
|-------------------------|--------------------------|
| University of Bristol   | Teri-Louise North        |
| University of Bristol   | Tim Dong                 |
| University of Bristol   | Tom Palmer               |
| University of Bristol   | Venexia Walker           |
| University of Cambridge | Alexia Sampri            |
| University of Cambridge | Amir Gavrieli            |
| University of Cambridge | Angela Wood              |
| University of Cambridge | Carmen Petitjean         |
| University of Cambridge | Chriselda Oliver         |
| University of Cambridge | David Brind              |
| University of Cambridge | Elena Raffetti           |
| University of Cambridge | Elias Allara             |
| University of Cambridge | Emanuele Di Angelantonio |
| University of Cambridge | Eoin McKinney            |
| University of Cambridge | Fabian Falck             |
| University of Cambridge | Genevieve Cezard         |
| University of Cambridge | Hannah Harrison          |
| University of Cambridge | Haoting Zhang            |
| University of Cambridge | Isabel Walter            |
| University of Cambridge | Jessica Barrett          |
| University of Cambridge | John Danesh              |
| University of Cambridge | John Ford                |
| University of Cambridge | Katie Saunders           |
| University of Cambridge | Lisa Pennells            |
| University of Cambridge | Mike Inouye              |
| University of Cambridge | Robert Fletcher          |
| University of Cambridge | Rutendo Mapeta           |
| University of Cambridge | Samantha Ip              |
| University of Cambridge | Spencer Keene            |
| University of Cambridge | Stephen Kaptoge          |
| University of Cambridge | Tianxiao Wang            |
| University of Cambridge | Tom Pape                 |
| University of Cambridge | Wen Shi                  |

| Institution             | Member Name             |
|-------------------------|-------------------------|
| University of Cambridge | Xilin Jiang             |
| University of Cambridge | Xiyun Jiang             |
| University of Cambridge | Yanfan Li               |
| University of Dundee    | Daniel Morales          |
| University of Dundee    | David Moreno Martos     |
| University of Dundee    | Ewan Pearson            |
| University of Dundee    | Huan Wang               |
| University of Dundee    | Iffy Mordi              |
| University of Dundee    | Samira Bell             |
| University of Edinburgh | Alan Carson             |
| University of Edinburgh | Alice Hosking           |
| University of Edinburgh | Annemarie Docherty      |
| University of Edinburgh | Baljean Dhillon         |
| University of Edinburgh | Carlos Sanchez Soriano  |
| University of Edinburgh | Caroline Jackson        |
| University of Edinburgh | Christian Schnier       |
| University of Edinburgh | Claire Tochel           |
| University of Edinburgh | Gwenetta Curry          |
| University of Edinburgh | Huayu Zhang             |
| University of Edinburgh | Michelle Williams       |
| University of Edinburgh | Miguel Bernabeu Linares |
| University of Edinburgh | Niamh McLennan          |
| University of Edinburgh | Rebecca Reynolds        |
| University of Edinburgh | Richard Chin            |
| University of Edinburgh | Steven Kerr             |
| University of Edinburgh | Tim Wilkinson           |
| University of Edinburgh | Verónica Cabreira       |
| University of Edinburgh | William Whiteley        |
| University of Exeter    | John Dennis             |
| University of Glasgow   | Angela Henderson        |
| University of Glasgow   | Clea du Toit            |
| University of Glasgow   | Colin Berry             |
| University of Glasgow   | Craig Melville          |

Institutions party to the Data Sharing Agreement with NHS England for access to the data in the Secure Data Environment service for England for CVD-COVID-UK/COVID-IMPACT are: Imperial College London, King's College London, Swansea University, University College London, University of Bristol, University of Cambridge, University of Glasgow, University of Leicester, University of Liverpool, University of Manchester, University of Oxford, University of Sheffield, University of Southampton.

## CVD-COVID-UK / COVID-IMPACT Consortium Members (05/09/2023)

| Institution             | Member Name         |
|-------------------------|---------------------|
| University of Glasgow   | Deborah Kinnear     |
| University of Glasgow   | Dennis Tran         |
| University of Glasgow   | Filip Sosenko       |
| University of Glasgow   | Frederick Ho        |
| University of Glasgow   | Jill Pell           |
| University of Glasgow   | Naveed Sattar       |
| University of Glasgow   | Salil Deo           |
| University of Glasgow   | Sandosh Padmanabhan |
| University of Glasgow   | Terry Quinn         |
| University of Leeds     | Jianhua Wu          |
| University of Leicester | Anna Hansell        |
| University of Leicester | Anvesha Singh       |
| University of Leicester | Atanu Bhattacharjee |
| University of Leicester | Cameron Razieh      |
| University of Leicester | Claire Lawson       |
| University of Leicester | Clare Gillies       |
| University of Leicester | Francesco Zaccardi  |
| University of Leicester | Iain Squire         |
| University of Leicester | Kamlesh Khunti      |
| University of Leicester | Matthew Bown        |
| University of Leicester | Sharmin Shabnam     |
| University of Leicester | Shirley Sze         |
| University of Leicester | Tom Norris          |
| University of Leicester | Tom Yates           |
| University of Leicester | Umesh Kadam         |
| University of Leicester | Yogini Chudasama    |
| University of Liverpool | Caroline Dale       |
| University of Liverpool | David Hughes        |
| University of Liverpool | Maria Sudell        |
| University of Liverpool | Mark Green          |
| University of Liverpool | Munir Pirmohamed    |
| University of Liverpool | Reecha Sofat        |
| University of Liverpool | Rohan Takhar        |

| Institution              | Member Name               |
|--------------------------|---------------------------|
| University of Liverpool  | Ruwanthi Kolamunnage-Dona |
| University of Manchester | Bernard Keavney           |
| University of Manchester | Craig Smith               |
| University of Manchester | David Jenkins             |
| University of Manchester | Evan Kontopantelis        |
| University of Manchester | George Tilston            |
| University of Manchester | Glen Martin               |
| University of Manchester | Joseph Firth              |
| University of Manchester | Lamiece Hassan            |
| University of Manchester | Lana Bojanić              |
| University of Manchester | Matthew Sperrin           |
| University of Manchester | Maya Buch                 |
| University of Manchester | Richard Williams          |
| University of Manchester | Ruth Norris               |
| University of Manchester | Ruth Watkinson            |
| University of Manchester | Sarah Steeg               |
| University of Manchester | Simon Frain               |
| University of Manchester | Simon Williams            |
| University of Newcastle  | Camille Carroll           |
| University of Newcastle  | Dexter Canoy              |
| University of Nottingham | Fiona Pearce              |
| University of Nottingham | Stephanie Lax             |
| University of Oxford     | Aashna Uppal              |
| University of Oxford     | Antonella Delmestri       |
| University of Oxford     | Ben Goldacre              |
| University of Oxford     | Ben Lacey                 |
| University of Oxford     | Dani Prieto-Alhambra      |
| University of Oxford     | Eva Morris                |
| University of Oxford     | George Nicholson          |
| University of Oxford     | James Sheppard            |
| University of Oxford     | Julia Hippisley-Cox       |
| University of Oxford     | Kazem Rahimi              |
| University of Oxford     | Lucy Wright               |

| Institution               | Member Name                      |
|---------------------------|----------------------------------|
| University of Oxford      | Mark Ashworth                    |
| University of Oxford      | Marta Pineda Moncusi             |
| University of Oxford      | Milad Nazarzadeh Larzjan         |
| University of Oxford      | Mohammad Mamouei                 |
| University of Oxford      | Nick Hall                        |
| University of Oxford      | Raph Goldacre                    |
| University of Oxford      | Salma Chaudhry                   |
| University of Oxford      | Sara Khalid                      |
| University of Oxford      | Seb Bacon                        |
| University of Oxford      | Seyed Alireza Hasheminasab       |
| University of Oxford      | Shishir Rao                      |
| University of Oxford      | Zeinab Bidel Taleshmekaieil      |
| University of Plymouth    | Marie-Louise Zeissler            |
| University of Sheffield   | Jen-Yu Amy Chang                 |
| University of Sheffield   | Norman Briffa                    |
| University of Sheffield   | Peter Bath                       |
| University of Sheffield   | Simone Croft                     |
| University of Sheffield   | Suzanne Mason                    |
| University of Sheffield   | Tim Chico                        |
| University of Southampton | Nazrul Islam                     |
| University of Strathclyde | Amanj Kurdi                      |
| University of Strathclyde | Kim Kavanagh                     |
| University of Strathclyde | Marion Bennie                    |
| University of Strathclyde | Tanja Mueller                    |
| University of Warwick     | Harry Wilde                      |
| University of Warwick     | Majel McGranahan                 |
| University of Warwick     | Sebastian Vollmer                |
| University of York        | Christina van der Feltz-Cornelis |
| University of York        | Han-I Wang                       |
| University of York        | Lorna Fraser                     |
| Wellcome Sanger Institute | Tapiwa Tungamirai                |
| Wellcome Trust            | Bilal Mateen                     |

Institutions party to the Data Sharing Agreement with NHS England for access to the data in the Secure Data Environment service for England for CVD-COVID-UK/COVID-IMPACT are: Imperial College London, King's College London, Swansea University, University College London, University of Bristol, University of Cambridge, University of Glasgow, University of Leicester, University of Liverpool, University of Manchester, University of Oxford, University of Sheffield, University of Southampton.
