# Supplementary material for: Understanding covid-19 outcomes among people with intellectual disabilities in England
Source: Springer Nature journal article supplement (doi:10.1186/s12889-023-16993-x), 2023-10-25
Supplement: MOESM1 [file 12889_2023_16993_MOESM1_ESM.pdf]

**Please cite the Published Version**

Sosenko, Filip, Mackay, Daniel, Pell, Jill P, Hatton, Chris , Jani, Bhautesh D, Cairns, Deborah, Ward, Laura, Henderson, Angela, Fleming, Michael, Nijhof, Dewy, Melville, Craig and CVD-COVID-UK/COVID-IMPACT Consortium (2023) Understanding COVID-19 outcomes among people with intellectual disabilities in England. BMC Public Health, 23 (1). 2099 ISSN 1471-2458

**DOI:** <https://doi.org/10.1186/s12889-023-16993-x>

**Publisher:** BMC

**Version:** Supplemental Material

**Downloaded from:** <https://e-space.mmu.ac.uk/632875/>

**Usage rights:**  [Creative Commons: Attribution 4.0](https://creativecommons.org/licenses/by/4.0/)

**Additional Information:** This is an open access article which originally appeared in BMC Public Health

**Data Access Statement:** The data used in this study are available in NHS England's Secure Data Environment (SDE) service for England, but as restrictions apply they are not publicly available (<https://digital.nhs.uk/services/secure-data-environment-service>). The CVD-COVID-UK/COVID-IMPACT programme led by the BHF Data Science Centre (<https://bhfdatasciencecentre.org/>) received approval to access data in NHS England's SDE service for England from the Independent Group Advising on the Release of Data (IGARD) (<https://digital.nhs.uk/about-nhs-digital/corporate-information-and-documents/independent-group-advising-on-the-release-of-data>) via an application made in the Data Access Request Service (DARS) Online system (ref. DARS-NIC-381078-Y9C5K) (<https://digital.nhs.uk/services/data-access-request-service-dars/dars-products-and-services>). The CVD-COVID-UK/COVID-IMPACT Approvals & Oversight Board (<https://bhfdatasciencecentre.org/areas/cvd-covid-uk-covid-impact/>) subsequently granted approval to this project to access the data within NHS England's SDE service for England. The de-identified data used in this study were made available to accredited researchers only. Those wishing to gain access to the data should contact [bhfdsc@hdrv.ac.uk](mailto:bhfdsc@hdrv.ac.uk) in the first instance.

**Enquiries:**

If you have questions about this document, contact [openresearch@mmu.ac.uk](mailto:openresearch@mmu.ac.uk). Please include the URL of the record in e-space. If you believe that your, or a third party's rights have been compromised through this document please see our Take Down policy (available from <https://www.mmu.ac.uk/library/using-the-library/policies-and-guidelines>)

## Additional file 1: Supplementary Tables

Table A1 Demographic and health characteristics of people with confirmed SARS-CoV-2 infection (TRE database)

|                                | Adults                  |                         |         | Children (under 18)    |                         |         | All                     |                         |         |
|--------------------------------|-------------------------|-------------------------|---------|------------------------|-------------------------|---------|-------------------------|-------------------------|---------|
|                                | No ID                   | ID                      | p value | No ID                  | ID                      | p value | No ID                   | ID                      | p value |
| N in the analysis dataset      | 8408930                 | 45820                   |         | 2247350                | 11055                   |         | 10661045                | 56880                   |         |
| Age at covid-19 (median [IQR]) | 41.79<br>[29.95, 54.99] | 40.79<br>[27.99, 57.81] | <0.001  | 11.97<br>[8.88, 14.89] | 13.48<br>[10.66, 15.79] | <0.001  | 35.01<br>[20.75, 51.05] | 33.77<br>[20.96, 54.02] | <0.001  |
| Female (%)                     | 54.0                    | 42.2                    | <0.001  | 50.4                   | 35.9                    | <0.001  | 53.3                    | 41.0                    | <0.001  |
| Ethnicity (%)                  |                         |                         | <0.001  |                        |                         | <0.001  |                         |                         | <0.001  |
| White                          | 82.8                    | 87.7                    |         | 82.3                   | 77.7                    |         | 82.7                    | 85.8                    |         |
| Asian                          | 9.2                     | 6.5                     |         | 8.7                    | 11.9                    |         | 9.1                     | 7.6                     |         |
| Black                          | 3.7                     | 3.1                     |         | 2.7                    | 4.1                     |         | 3.5                     | 3.3                     |         |
| Mixed                          | 1.9                     | 1.6                     |         | 3.9                    | 4.2                     |         | 2.3                     | 2.1                     |         |
| Other                          | 2.4                     | 1.0                     |         | 2.4                    | 2.1                     |         | 2.4                     | 1.2                     |         |
| IMD decile (mean (SD))         | 5.36<br>(2.85)          | 4.59 (2.74)             | <0.001  | 5.68 (2.93)            | 4.80 (2.87)             | <0.001  | 5.43 (2.87)             | 4.63 (2.77)             | <0.001  |

|                                               |             |             |        |             |             |        |             |             |        |
|-----------------------------------------------|-------------|-------------|--------|-------------|-------------|--------|-------------|-------------|--------|
| Percent vaccinated at least once              | 50.8        | 43.3        | <0.001 | 8.8         | 14.7        | <0.001 | 41.9        | 37.8        | <0.001 |
| Vaccine, if any: (%)                          |             |             | <0.001 |             |             |        |             |             | <0.001 |
| AstraZeneca                                   | 41.4        | 58.7        |        | *           | *           |        | 39.6        | 54.5        |        |
| Moderna                                       | 6.6         | 2.9         |        | *           | *           |        | 6.3         | 2.7         |        |
| Pfizer                                        | 51.9        | 38.4        |        | *           | *           |        | 54.0        | 42.7        |        |
| Percent affected by multimorbidity**          | 13.1        | 32.4        | <0.001 | 1.7         | 18.3        | <0.001 | 10.7        | 29.6        | <0.001 |
| Count of Long-Term Conditions (mean (SD))***  | 1.32 (3.18) | 2.60 (4.20) | <0.001 | 0.17 (0.84) | 1.18 (2.64) | <0.001 | 1.08 (2.89) | 2.33 (3.99) | <0.001 |
| Percent affected by polypharmacy****          | 20.9        | 55.6        | <0.001 | 3.4         | 21.8        | <0.001 | 17.3        | 49.0        | <0.001 |
| Count of prescription medications (mean (SD)) | 2.70 (3.84) | 6.28 (5.07) | <0.001 | 0.77 (1.52) | 2.79 (3.49) | <0.001 | 2.29 (3.57) | 5.60 (5.00) | <0.001 |

\* Figures suppressed due to disclosure rules.

\*\* Multimorbidity: 3+ LTCs (including ID) of which at least one is physical [9].

\*\*\* The count did not include ID.

\*\*\*\* 5+ prescription medications

Table A2 Demographic and health characteristics of people alive on 1 January 2020 who had a primary care record, England (TRE database)

|                                  | Adults               |                      |         | Children (under 18) |                     |         | All                  |                      |         |
|----------------------------------|----------------------|----------------------|---------|---------------------|---------------------|---------|----------------------|----------------------|---------|
|                                  | No ID                | ID                   | p value | No ID               | ID                  | p value | No ID                | ID                   | p value |
| N in the analysis dataset        | 48,274,905           | 289,085              |         | 12,914,260          | 76,945              |         | 61,189,165           | 366,030              |         |
| Age on 1 Jan 2020 (median [IQR]) | 47.00 [33.00, 63.00] | 39.00 [27.00, 55.00] | <0.001  | 9.00 [4.00, 14.00]  | 13.00 [9.00, 16.00] | <0.001  | 39.00 [22.00, 58.00] | 32.00 [20.00, 51.00] | <0.001  |
| Female (%)                       | 50.3                 | 40.6                 | <0.001  | 48.9                | 34.6                | <0.001  | 50.0                 | 39.4                 | <0.001  |
| Ethnicity (%)                    |                      |                      | <0.001  |                     |                     | <0.001  |                      |                      | <0.001  |
| White                            | 81.9                 | 87.5                 |         | 74.2                | 73.2                |         | 80.2                 | 84.5                 |         |
| Asian                            | 8.9                  | 6.4                  |         | 11.9                | 12.9                |         | 9.5                  | 7.8                  |         |
| Black                            | 3.9                  | 3.3                  |         | 5.3                 | 6.9                 |         | 4.2                  | 4.1                  |         |
| Mixed                            | 1.7                  | 1.6                  |         | 4.6                 | 4.2                 |         | 2.3                  | 2.1                  |         |
| Other                            | 3.7                  | 1.1                  |         | 4.0                 | 2.8                 |         | 3.8                  | 1.5                  |         |
| IMD decile (mean (SD))           | 5.44 (2.84)          | 4.54 (2.76)          | <0.001  | 5.20 (2.93)         | 4.66 (2.85)         | <0.001  | 5.39 (2.86)          | 4.57 (2.78)          | <0.001  |

|                                               |             |             |        |             |             |        |             |             |        |
|-----------------------------------------------|-------------|-------------|--------|-------------|-------------|--------|-------------|-------------|--------|
| Count of Long-Term Conditions (mean (SD))*    | 1.00 (2.66) | 1.48 (3.10) | <0.001 | 0.18 (0.80) | 0.89 (2.22) | <0.001 | 0.83 (2.41) | 1.35 (2.94) | <0.001 |
| Percent affected by multimorbidity**          | 10.0        | 19.7        | <0.001 | 1.6         | 13.7        | <0.001 | 8.2         | 18.4        | <0.001 |
| Count of prescription medications (mean (SD)) | 2.71 (3.88) | 4.95 (4.70) | <0.001 | 0.62 (1.37) | 2.43 (3.27) | <0.001 | 2.27 (3.60) | 4.42 (4.55) | <0.001 |
| Percent affected by polypharmacy***           | 22.6        | 44.0        | <0.001 | 2.5         | 18.6        | <0.001 | 18.3        | 38.6        | <0.001 |

\* The count does not include ID.

\*\* Multimorbidity: 3+ LTCs (including ID) of which at least one is physical.

\*\*\* 5+ prescription medications.

Table A3 Demographic and health characteristics of adults who died due to covid-19, by ID status (TRE database)

|                                               | No ID                   | ID                      | p-value |
|-----------------------------------------------|-------------------------|-------------------------|---------|
| N in the analysis dataset                     | 160,230                 | 2,040                   |         |
| Age at covid-19 (median [IQR])                | 82.94<br>[73.91, 89.17] | 65.57<br>[56.17, 75.00] | <0.001  |
| Female (%)                                    | 45.1                    | 40.9                    | <0.001  |
| Ethnicity (%)                                 |                         |                         | 0.07    |
| White                                         | 88.1                    | 89.7                    |         |
| Asian                                         | 6.8                     | 6.3                     |         |
| Black                                         | 3.1                     | 2.6                     |         |
| Mixed                                         | 0.7                     | 0.6                     |         |
| Other                                         | 1.4                     | 0.7                     |         |
| IMD decile (mean (SD))                        | 5.12<br>(2.86)          | 4.54 (2.70)             | <0.001  |
| Percent vaccinated at least once              | 19.2                    | 13.8                    | <0.001  |
| Vaccine (%):                                  |                         |                         |         |
| AstraZeneca                                   | *                       | *                       |         |
| Moderna                                       | *                       | *                       |         |
| Pfizer                                        | *                       | *                       |         |
| Count of Long-Term Conditions (mean (SD))**   | 10.05<br>(5.71)         | 8.19 (5.42)             | <0.001  |
| Percent affected by multimorbidity***         | 86.3                    | 85.2                    | 0.171   |
| Count of prescription medications (mean (SD)) | 10.80<br>(4.54)         | 10.76<br>(4.44)         | 0.708   |

|                                      |      |      |       |
|--------------------------------------|------|------|-------|
| Percent affected by polypharmacy**** | 87.8 | 88.9 | 0.147 |
|--------------------------------------|------|------|-------|

\* Figures suppressed due to disclosure rules.

\*\* The count does not include ID.

\*\*\* Multimorbidity: 3+ LTCs (including ID) of which at least one is physical.

\*\*\*\* 5+ prescription medications.

*Table A4 Crude probability of dying due to a cause other than covid-19, by ID status, 2020 (TRE database)*

|                                        | ID            | No ID                |
|----------------------------------------|---------------|----------------------|
| Population size*                       | 365,155       | 61,086,510           |
| Number of non-covid-19 deaths          | 3,665         | 451,445              |
| Cumulative incidence (%)               | 1.00          | 0.74                 |
| That is 1 in ...                       | 100           | 136                  |
| Crude Risk Ratio                       | 1.4           |                      |
| Number of expected non-covid-19 deaths | 1,061         | reference population |
| Non-covid-19 SMR [95% CI]              | 3.5 [3.3-3.7] |                      |

\* Number of records in the dataset

Table A5 Probability of severe covid-19 in the whole population, by ID status and year (TRE dataset)

|                                             | 2020          |                      | 2021          |                      |
|---------------------------------------------|---------------|----------------------|---------------|----------------------|
|                                             | ID            | No ID                | ID            | No ID                |
| Population size*                            | 365,155       | 61,086,510           | 365,890       | 61,675,315           |
| Number of cases of severe covid**           | 3,835         | 255,740              | 4,085         | 303,560              |
| Cumulative incidence (%)                    | 1.05          | 0.42                 | 1.12          | 0.49                 |
| That is 1 in ...                            | 95            | 237                  | 88            | 200                  |
| Crude Risk Ratio                            | 2.5           |                      | 2.3           |                      |
| Number of expected cases of severe covid-19 | 870           | reference population | 1,227         | reference population |
| Severe covid-19 SIR [95% CI]                | 4.4 [4.3-4.5] |                      | 3.3 [3.2-3.4] |                      |

\* Number in the analysis dataset

\*\* Unique individuals

Table A6 Pseudo R-squared and Information Criteria from hierarchical logistic regression predicting the risk of **non-covid-19 death** in 2020 (TRE dataset)

|                      | ID        |         |            | No ID     |           |              |
|----------------------|-----------|---------|------------|-----------|-----------|--------------|
|                      | Pseudo R2 | AIC     | BIC        | Pseudo R2 | AIC       | BIC          |
| Intercept-only       | 0.000     | 38441.3 | -3594224.3 | 0.000     | 5063103.1 | -848032522.7 |
| As above + age       | 0.143     | 32945.9 | -3599709.2 | 0.242     | 3836820   | -849258790   |
| As above + sex       | 0.143     | 32945.2 | -3599699.3 | 0.244     | 3828191.1 | -849267403.3 |
| As above + ethnicity | 0.143     | 32946.4 | -3599687.5 | 0.244     | 3826851.1 | -849268727.6 |



|                           |       |         |            |       |           |              |
|---------------------------|-------|---------|------------|-------|-----------|--------------|
| As above + IMD decile     | 0.143 | 32948   | -3599643.6 | 0.248 | 3807953.6 | -849287562.3 |
| As above + multimorbidity | 0.246 | 28987.7 | -3603593.3 | 0.370 | 3190420.7 | -849905079.5 |
| As above + polypharmacy   | 0.273 | 27963.1 | -3604607.3 | 0.398 | 3048954.5 | -850046530   |

Table A7 List of SNOMED CT codes used to identify ID

| SNOMED CT code | description                                       |
|----------------|---------------------------------------------------|
| 2593002        | Dubowitz's syndrome                               |
| 5619004        | Bardet-Biedl syndrome                             |
| 10007009       | Coffin-Siris syndrome                             |
| 15182000       | Coffin-Lowry syndrome                             |
| 17122004       | 4p partial monosomy syndrome                      |
| 17827007       | Cross syndrome                                    |
| 21111006       | Complete trisomy 13 syndrome                      |
| 21634003       | Borjeson-Forssman-Lehmann syndrome                |
| 31216003       | Profound intellectual disability                  |
| 33982008       | Hyperphosphatasemia with intellectual disability  |
| 40354009       | De Lange syndrome                                 |
| 40700009       | Severe intellectual disability                    |
| 41040004       | Complete trisomy 21 syndrome                      |
| 51500006       | Complete trisomy 18 syndrome                      |
| 56604005       | Cohen syndrome                                    |
| 57917004       | Seckel syndrome                                   |
| 59252009       | Cutis laxa-corneal clouding-oligophrenia syndrome |
| 61152003       | Moderate intellectual disability                  |
| 65327002       | Mucopolysaccharidosis type I-H                    |
| 66758006       | Acrodysostosis                                    |
| 68618008       | Rett's disorder                                   |
| 70173007       | 5p partial monosomy syndrome                      |
| 76880004       | Angelman syndrome                                 |
| 79385002       | Lowe syndrome                                     |
| 86765009       | Mild intellectual disability                      |
| 89392001       | Prader-Willi syndrome                             |
| 109478007      | Kohlschutter's syndrome                           |
| 110359009      | Intellectual disability                           |
| 205615000      | Trisomy 21- meiotic nondisjunction                |
| 205616004      | Trisomy 21- mitotic nondisjunction mosaicism      |

|           |                                                                                                        |
|-----------|--------------------------------------------------------------------------------------------------------|
| 205824006 | Noonan's syndrome                                                                                      |
| 232059000 | Laurence-Moon syndrome                                                                                 |
| 234146006 | Lymphedema lymphangiectasia intellectual disability syndrome                                           |
| 253176002 | Gillespie syndrome                                                                                     |
| 254264002 | Partial trisomy 21 in Down's syndrome                                                                  |
| 254268004 | Partial trisomy 13 in Patau's syndrome                                                                 |
| 371045000 | Translocation Down syndrome                                                                            |
| 401315004 | Smith-Magenis syndrome                                                                                 |
| 403554008 | Oculo-cerebro-cutaneous syndrome (aplasia cutis skin tags eye & brain defects)                         |
| 412787009 | Intellectual disability congenital heart disease blepharophimosis blepharoptosis and hypoplastic teeth |
| 416075005 | On learning disability register (finding)                                                              |
| 422437002 | X-linked intellectual disability with marfanoid habitus                                                |
| 432091002 | Savant syndrome                                                                                        |
| 442511009 | PEHO syndrome                                                                                          |
| 699297004 | Ohdo syndrome, Maat-Kievit-Brunner type                                                                |
| 699298009 | Blepharophimosis-mental retardation syndrome Say-Barber-Biesecker-Young-Simpson type                   |
| 699669001 | Renpenning syndrome                                                                                    |
| 702327009 | Monocarboxylate transporter 8 deficiency                                                               |
| 702344008 | Pitt-Hopkins syndrome                                                                                  |
| 702357000 | Chromosome 2q37 deletion syndrome                                                                      |
| 702412005 | Partington syndrome                                                                                    |
| 702416008 | Snyder-Robinson syndrome                                                                               |
| 702816000 | Methyl-cytosine phosphate guanine binding protein-2 duplication syndrome                               |
| 703526007 | Progressive epilepsy-intellectual disability syndrome Finnish type                                     |
| 703535000 | Mowat-Wilson syndrome                                                                                  |
| 715409005 | Trigonocephaly C syndrome                                                                              |
| 715428003 | Skeletal dysplasia with epilepsy and short stature syndrome                                            |
| 715628009 | Intellectual disability truncal obesity retinal dystrophy and micropenis syndrome                      |
| 715989002 | Karandikar Maria Kamble syndrome                                                                       |
| 716024001 | GMS syndrome                                                                                           |
| 716089008 | Craniofacial digital and genital anomalies syndrome                                                    |
| 716096005 | Goldblatt Wallis syndrome                                                                              |
| 716112005 | Kawashima Tsuji syndrome                                                                               |
| 716191002 | Alopecia and intellectual disability syndrome                                                          |
| 716334004 | Intellectual disability and short stature with hand contracture and genital anomaly syndrome           |
| 716709002 | FRAXE intellectual disability syndrome                                                                 |
| 716996008 | L1 syndrome                                                                                            |

|           |                                                                                                             |
|-----------|-------------------------------------------------------------------------------------------------------------|
| 717157006 | Trisomy 10p                                                                                                 |
| 717223008 | X-linked epilepsy with learning disability and behavior disorder syndrome                                   |
| 717763008 | Chudley Lowry Hoar syndrome                                                                                 |
| 717822006 | Goldberg Shprintzen megacolon syndrome                                                                      |
| 717887003 | Biernard syndrome type 2                                                                                    |
| 717945001 | BRESEK syndrome                                                                                             |
| 718226002 | Wolf Hirschhorn syndrome                                                                                    |
| 718573009 | Achalasia microcephaly syndrome                                                                             |
| 718577005 | Atkin Flaitz syndrome                                                                                       |
| 718680001 | Oro-facial digital syndrome type 9                                                                          |
| 718681002 | Oro-facial digital syndrome type 11                                                                         |
| 718766002 | Spondyloepiphyseal dysplasia, craniosynostosis, cleft palate, cataract and intellectual disability syndrome |
| 718846001 | X-linked intellectual disability Zorick type                                                                |
| 718848000 | Fried syndrome                                                                                              |
| 718897009 | X-linked intellectual disability Seemanova type                                                             |
| 718900002 | Syndromic X-linked intellectual disability type 11                                                          |
| 718905007 | X-linked intellectual disability Shrimpton type                                                             |
| 718908009 | X-linked intellectual disability Siderius type                                                              |
| 718909001 | X-linked intellectual disability Stevenson type                                                             |
| 718910006 | X-linked intellectual disability Stocco Dos Santos type                                                     |
| 718911005 | X-linked intellectual disability Stoll type                                                                 |
| 718912003 | X-linked intellectual disability Turner type                                                                |
| 718914002 | X-linked intellectual disability Van Esch type                                                              |
| 719009006 | X-linked intellectual disability Wilson type                                                                |
| 719010001 | X-linked intellectual disability Schimke type                                                               |
| 719011002 | X-linked intellectual disability Pai type                                                                   |
| 719012009 | X-linked intellectual disability Miles Carpenter type                                                       |
| 719013004 | X-linked intellectual disability Cilliers type                                                              |
| 719016007 | X-linked intellectual disability Cantagrel type                                                             |
| 719017003 | X-linked intellectual disability Armfield type                                                              |
| 719018008 | X-linked intellectual disability Abidi type                                                                 |
| 719020006 | Pallister W syndrome                                                                                        |
| 719069008 | Shprintzen Goldberg craniosynostosis syndrome                                                               |
| 719097002 | BSG syndrome                                                                                                |
| 719136005 | X-linked intellectual disability with cerebellar hypoplasia syndrome                                        |
| 719137001 | X-linked intellectual disability with corpus callosum agenesis and spastic quadriplegia syndrome            |
| 719138006 | X-linked intellectual disability with cubitus valgus and dysmorphism syndrome                               |
| 719139003 | Pettigrew syndrome                                                                                          |
| 719140001 | Prieto Badia Mulas syndrome                                                                                 |

|           |                                                                                                                  |
|-----------|------------------------------------------------------------------------------------------------------------------|
| 719155005 | X-linked intellectual disability and epilepsy with progressive joint contracture and facial dysmorphism syndrome |
| 719157002 | X-linked intellectual disability and hypotonia with facial dysmorphism and aggressive behaviour syndrome         |
| 719160009 | Syndromic X-linked intellectual disability type 7                                                                |
| 719162001 | Radioulnar synostosis with microcephaly and scoliosis syndrome                                                   |
| 719202006 | Spondyloepiphyseal dysplasia tarda Kohn type                                                                     |
| 719212004 | Smith Fineman Myers syndrome                                                                                     |
| 719378009 | Microcephalus with brachydactyly and kyphoscoliosis syndrome                                                     |
| 719380003 | Microcephalus cardiomyopathy syndrome                                                                            |
| 719396000 | Microcephalus and intellectual disability with phalangeal and neurological anomaly syndrome                      |
| 719450007 | Disorder of sex development with intellectual disability syndrome                                                |
| 719599008 | 19q13.11 microdeletion syndrome                                                                                  |
| 719800009 | DOORS syndrome                                                                                                   |
| 719808002 | Chromosome Xp11.3 microdeletion syndrome                                                                         |
| 719810000 | X-linked intellectual disability with seizure and psoriasis syndrome                                             |
| 719811001 | X-linked intellectual disability Cabezas type                                                                    |
| 719812008 | X-linked intellectual disability with plagiocephaly syndrome                                                     |
| 719834005 | Wilson Turner syndrome                                                                                           |
| 719842006 | Congenital hypoplasia of ulna and intellectual disability syndrome                                               |
| 719909009 | Chromosome Xq28 trisomy syndrome                                                                                 |
| 719947004 | Temtamy syndrome                                                                                                 |
| 720401009 | Cystic fibrosis with gastritis and megaloblastic anemia syndrome                                                 |
| 720468000 | Aniridia and intellectual disability syndrome                                                                    |
| 720501007 | Arachnodactyly with abnormal ossification and intellectual disability syndrome                                   |
| 720517001 | Ataxia with deafness and intellectual disability syndrome                                                        |
| 720523006 | Autosomal recessive limb girdle muscular dystrophy type 2K                                                       |
| 720635002 | Cerebro-facio-thoracic dysplasia                                                                                 |
| 720639008 | Coloboma congenital heart disease ichthyosiform dermatosis intellectual disability ear anomaly syndrome          |
| 720746006 | Contracture with ectodermal dysplasia and orofacial cleft syndrome                                               |
| 720748007 | Cooper Jabs syndrome                                                                                             |
| 720954000 | Filippi syndrome                                                                                                 |
| 720955004 | Fine Lubinsky syndrome                                                                                           |
| 720957007 | Deafness with skeletal dysplasia and lip granuloma syndrome                                                      |
| 720958002 | Frank-Ter Haar syndrome                                                                                          |
| 720979002 | Alopecia contracture dwarfism intellectual disability syndrome                                                   |
| 720981000 | Alopecia and intellectual disability with hypergonadotropic hypogonadism syndrome                                |
| 720982007 | Alport syndrome intellectual disability midface hypoplasia elliptocytosis syndrome                               |

|           |                                                                                                        |
|-----------|--------------------------------------------------------------------------------------------------------|
| 721007005 | Hair defect with photosensitivity and intellectual disability syndrome                                 |
| 721008000 | Hall Riggs syndrome                                                                                    |
| 721017000 | Postaxial polydactyly and intellectual disability syndrome                                             |
| 721073008 | Short stature with webbed neck and congenital heart disease syndrome                                   |
| 721087008 | Deafness and intellectual disability Martin Probst type syndrome                                       |
| 721089006 | Dentinogenesis imperfecta short stature hearing loss intellectual disability syndrome                  |
| 721146009 | Intellectual disability, epilepsy, bulbous nose syndrome                                               |
| 721207002 | Seizure sensorineural deafness ataxia intellectual disability electrolyte imbalance syndrome           |
| 721208007 | Ectodermal dysplasia with blindness syndrome                                                           |
| 721224008 | Holmes Gang syndrome                                                                                   |
| 721875000 | Juberg Marsidi syndrome                                                                                |
| 721973006 | Lipodystrophy intellectual disability deafness syndrome                                                |
| 721974000 | Lowry MacLean syndrome                                                                                 |
| 722002002 | Intellectual disability balding patella luxation acromicria syndrome                                   |
| 722003007 | Intellectual disability with cataract and kyphosis syndrome                                            |
| 722031003 | Kapur Toriello syndrome                                                                                |
| 722033000 | Macrocephaly, short stature, paraplegia syndrome                                                       |
| 722035007 | Intellectual disability enteropathy deafness peripheral neuropathy ichthyosis keratoderma syndrome     |
| 722037004 | Intellectual disability epileptic seizures hypogonadism and hypogonadism microcephaly obesity syndrome |
| 722055008 | Oculopalatocerebral syndrome                                                                           |
| 722065002 | Okamoto syndrome                                                                                       |
| 722110003 | Osteogenesis imperfecta retinopathy seizures intellectual disability syndrome                          |
| 722111004 | Osteopenia, myopia, hearing loss, intellectual disability, facial dysmorphism syndrome                 |
| 722209002 | Spastic paraplegia, intellectual disability, palmoplantar hyperkeratosis syndrome                      |
| 722213009 | Severe X-linked intellectual disability Gustavson type                                                 |
| 722281001 | Agammaglobulinemia microcephaly craniosynostosis severe dermatitis syndrome                            |
| 722282008 | Agenesis of corpus callosum, intellectual disability, coloboma, micrognathia syndrome                  |
| 722379001 | Congenital cataract with hypertrichosis and intellectual disability syndrome                           |
| 722380003 | Congenital cataract with intellectual disability and hypogonadotropic hypogonadism syndrome            |
| 722454003 | Intellectual disability, craniofacial dysmorphism, hypogonadism, diabetes mellitus syndrome            |

|           |                                                                                                           |
|-----------|-----------------------------------------------------------------------------------------------------------|
| 722455002 | Intellectual disability hypoplastic corpus callosum preauricular tag syndrome                             |
| 722456001 | Intellectual disability, developmental delay, contracture syndrome                                        |
| 722459008 | Male hypergonadotropic hypogonadism, intellectual disability, skeletal anomaly syndrome                   |
| 722478008 | Skeletal dysplasia with intellectual disability syndrome                                                  |
| 723304001 | Microcephaly, seizure, intellectual disability, heart disease syndrome                                    |
| 723332005 | Isodicentric chromosome 15 syndrome                                                                       |
| 723333000 | Faciocardiorenal syndrome                                                                                 |
| 723336008 | Fallot complex with intellectual disability and growth delay syndrome                                     |
| 723365002 | Hypotrichosis and intellectual disability syndrome Lopes type                                             |
| 723403008 | Microbrachycephaly, ptosis, cleft lip syndrome                                                            |
| 723441001 | Non-progressive cerebellar ataxia with intellectual disability                                            |
| 723501008 | Renier Gabreels Jasper syndrome                                                                           |
| 723504000 | Ramos Arroyo syndrome                                                                                     |
| 723621000 | Spastic tetraplegia, retinitis pigmentosa, intellectual disability syndrome                               |
| 723676007 | Severe intellectual disability epilepsy anal anomaly distal phalangeal hypoplasia syndrome                |
| 723994004 | Seizures and intellectual disability due to hydroxylysinuria                                              |
| 724001005 | Retinitis pigmentosa intellectual disability deafness hypogonadism syndrome                               |
| 724137002 | Macrocephaly obesity mental disability ocular abnormality syndrome                                        |
| 724207001 | Kleefstra syndrome                                                                                        |
| 724228005 | Infantile choroidocerebral calcification syndrome                                                         |
| 725140007 | Temple Baraitser syndrome                                                                                 |
| 725163002 | X-linked spasticity intellectual disability epilepsy syndrome                                             |
| 725289009 | 5-amino-4-imidazole carboxamide ribosiduria                                                               |
| 725589005 | Bullous dystrophy macular type                                                                            |
| 725906006 | Intellectual disability Buenos Aires type                                                                 |
| 725908007 | Neurofaciodigitorenal syndrome                                                                            |
| 725912001 | X-linked intellectual disability Brooks type                                                              |
| 726031001 | Cerebellar ataxia intellectual disability optic atrophy skin abnormalities syndrome                       |
| 726670008 | Weaver Williams syndrome                                                                                  |
| 726672000 | Short stature, unique facies, enamel hypoplasia, progressive joint stiffness, high-pitched voice syndrome |
| 726709001 | Intellectual disability cataract calcified pinna myopathy syndrome                                        |
| 726727003 | X-linked intellectual disability Hedera type                                                              |
| 726732002 | X-linked intellectual disability Nascimento type                                                          |

|           |                                                                                                   |
|-----------|---------------------------------------------------------------------------------------------------|
| 732246009 | X-linked intellectual disability, limb spasticity, retinal dystrophy, diabetes insipidus syndrome |
| 732251003 | Cortical blindness, intellectual disability, polydactyly syndrome                                 |
| 732954002 | Osteopenia, intellectual disability, sparse hair syndrome                                         |
| 732961003 | Branchial dysplasia intellectual disability inguinal hernia syndrome                              |
| 733031004 | Epilepsy microcephaly skeletal dysplasia syndrome                                                 |
| 733032006 | Epilepsy telangiectasia syndrome                                                                  |
| 733049004 | Encephalopathy intracerebral calcification retinal degeneration syndrome                          |
| 733072002 | Alaninuria microcephaly dwarfism enamel hypoplasia diabetes mellitus syndrome                     |
| 733086003 | Pseudoprogeria syndrome                                                                           |
| 733088002 | Preaxial polydactyly, colobomata, intellectual disability syndrome                                |
| 733090001 | Microcephalus, digital anomaly, intellectual disability syndrome                                  |
| 733097003 | Ichthyosis, intellectual disability, dwarfism, renal impairment syndrome                          |
| 733110004 | Van den Bosch syndrome                                                                            |
| 733117001 | Thumb stiffness, brachydactyly, intellectual disability syndrome                                  |
| 733417008 | Facial dysmorphism, macrocephaly, myopia, Dandy-Walker malformation syndrome                      |
| 733419006 | Metaphyseal dysostosis intellectual disability conductive deafness syndrome                       |
| 733455003 | Spastic paraplegia, glaucoma, intellectual disability syndrome                                    |
| 733472005 | Microcephalus, glomerulonephritis, marfanoid habitus syndrome                                     |
| 733522005 | Megalocornea with intellectual disability syndrome                                                |
| 734017008 | Ectodermal dysplasia, intellectual disability, central nervous system malformation syndrome       |
| 734349003 | Alpha-thalassaemia intellectual disability syndrome linked to chromosome 16                       |
| 763136000 | Charcot-Marie-Tooth disease deafness intellectual disability syndrome                             |
| 763186006 | Grubben, De Cock, Borghgraef syndrome                                                             |
| 763320005 | Craniofaciofrontodigital syndrome                                                                 |
| 763350002 | Intellectual disability obesity brain malformation facial dysmorphism syndrome                    |
| 763404001 | Ichthyosis alopecia eclabion ectropion intellectual disability syndrome                           |
| 763615003 | Aortic arch anomaly facial dysmorphism intellectual disability syndrome                           |
| 763618001 | Wiedemann Steiner syndrome                                                                        |
| 763626009 | Intellectual disability due to nutritional deficiency                                             |
| 763665007 | Craniodigital syndrome and intellectual disability syndrome                                       |
| 763722004 | Hypotonia, speech impairment, severe cognitive delay syndrome                                     |
| 763741001 | Intellectual disability, alacrima, achalasia syndrome                                             |

|           |                                                                                                   |
|-----------|---------------------------------------------------------------------------------------------------|
| 763742008 | Intellectual disability, polydactyly, uncombable hair syndrome                                    |
| 763743003 | Intellectual disability spasticity ectrodactyly syndrome                                          |
| 763744009 | Intellectual disability brachydactyly Pierre Robin syndrome                                       |
| 763745005 | Intellectual disability Wolff type                                                                |
| 763773007 | Macrocephaly and developmental delay syndrome                                                     |
| 763795006 | Malan overgrowth syndrome                                                                         |
| 763797003 | Agenesis of corpus callosum and abnormal genitalia syndrome                                       |
| 763837007 | Oro-facial digital syndrome type 14                                                               |
| 763861000 | Pachygyria intellectual disability epilepsy syndrome                                              |
| 764861005 | Intellectual disability Birk-Barel type                                                           |
| 764950001 | Cryptorchidism, arachnodactyly, intellectual disability syndrome                                  |
| 764959000 | Intellectual disability myopathy short stature endocrine defect syndrome                          |
| 765089003 | Focal epilepsy intellectual disability cerebro-cerebellar malformation syndrome                   |
| 765170001 | Sodium voltage-gated channel alpha subunit 8-related epilepsy with encephalopathy                 |
| 765434008 | Human immunodeficiency virus type I enhancer binding protein 2 related intellectual disability    |
| 765471005 | X-linked intellectual disability, hypogonadism, ichthyosis, obesity, short stature syndrome       |
| 765761009 | Brachydactyly mesomelia intellectual disability heart defect syndrome                             |
| 766753005 | Nijmegen breakage syndrome-like disorder                                                          |
| 766870005 | Epiphyseal dysplasia, hearing loss, dysmorphism syndrome                                          |
| 766871009 | Diencephalic mesencephalic junction dysplasia                                                     |
| 768677000 | PPP2R5D-related intellectual disability                                                           |
| 770401007 | 10q22.3q23.3 microdeletion syndrome                                                               |
| 770411000 | Distal monosomy 19p13.3                                                                           |
| 770564004 | Microcephalic primordial dwarfism Alazami type                                                    |
| 770566002 | Monosomy 13q14 syndrome                                                                           |
| 770595006 | Ring chromosome 12 syndrome                                                                       |
| 770663003 | Tetrasomy 11q24.1                                                                                 |
| 770678005 | Progressive encephalopathy with edema hypersarrhythmia and optic atrophy-like syndrome            |
| 770679002 | Polyneuropathy intellectual disability acromicria premature menopause syndrome                    |
| 770719004 | 3q27.3 microdeletion syndrome                                                                     |
| 770750002 | Intellectual disability seizures macrocephaly obesity syndrome                                    |
| 770755007 | Intellectual disability seizures hypotonia ophthalmologic skeletal anomalies syndrome             |
| 770901001 | Autosomal recessive intellectual disability motor dysfunction multiple joint contracture syndrome |
| 770907002 | Kagami Ogata syndrome                                                                             |



|           |                                                                                                                        |
|-----------|------------------------------------------------------------------------------------------------------------------------|
| 770908007 | 49XXXXYY syndrome                                                                                                      |
| 770948004 | Rhizomelic syndrome Urbach type                                                                                        |
| 771072001 | Monosomy 9p                                                                                                            |
| 771149000 | Hepatic fibrosis renal cyst intellectual disability syndrome                                                           |
| 771262009 | Pseudoleprechaunism syndrome Patterson type                                                                            |
| 771336003 | Polymicrogyria with optic nerve hypoplasia                                                                             |
| 771472009 | Developmental and speech delay due to SRY-box 5 deficiency                                                             |
| 771512003 | Autism spectrum disorder due to AUTS2 activator of transcription and developmental regulator deficiency                |
| 772127009 | White Sutton syndrome                                                                                                  |
| 773230003 | Cyclin-dependent kinase-like 5 deficiency                                                                              |
| 773329005 | CK syndrome                                                                                                            |
| 773394007 | Autosomal recessive frontotemporal pachygyria                                                                          |
| 773400009 | Severe feeding difficulties failure to thrive microcephaly due to ASXL transcriptional regulator 3 deficiency syndrome |
| 773405004 | Intellectual disability with strabismus syndrome                                                                       |
| 773419004 | Severe intellectual disability short stature behavioral abnormalities facial dysmorphism syndrome                      |
| 773498006 | Autosomal recessive cerebellar ataxia epilepsy intellectual disability syndrome due to TUD deficiency                  |
| 773581009 | Intellectual disability craniofacial dysmorphism cryptorchidism syndrome                                               |
| 773665006 | Hypogonadotropic hypogonadism severe microcephaly sensorineural hearing loss dysmorphism syndrome                      |
| 773670004 | Distal Xq28 microduplication syndrome                                                                                  |
| 773699009 | Pitt Hopkins-like syndrome                                                                                             |
| 773769008 | Ataxia photosensitivity short stature syndrome                                                                         |
| 773772001 | Rare non-syndromic intellectual disability                                                                             |
| 774068004 | AHDC1-related intellectual disability obstructive sleep apnea mild dysmorphism syndrome                                |
| 778011005 | Severe intellectual disability and progressive spastic paraplegia                                                      |
| 782676009 | Distal trisomy 18q                                                                                                     |
| 782723007 | Severe intellectual disability progressive spastic diplegia syndrome                                                   |
| 782736007 | Intellectual disability facial dysmorphism syndrome due to SET domain containing 5 haploinsufficiency                  |
| 782753000 | Intellectual disability coarse face macrocephaly cerebellar hypotrophy syndrome                                        |
| 782755007 | Primary microcephaly mild intellectual disability young-onset diabetes syndrome                                        |
| 782772000 | Congenital muscular dystrophy with intellectual disability and severe epilepsy                                         |
| 782886007 | Infantile spasms psychomotor retardation progressive brain atrophy basal ganglia disease syndrome                      |
| 782941005 | Richieri Costa-da Silva syndrome                                                                                       |

|                 |                                                                                                     |
|-----------------|-----------------------------------------------------------------------------------------------------|
| 782945001       | Ophthalmoplegia intellectual disability lingua scrotalis syndrome                                   |
| 783005002       | Severe microbrachycephaly intellectual disability athetoid cerebral palsy syndrome                  |
| 783174004       | Congenital muscular dystrophy with intellectual disability                                          |
| 783702009       | X-linked intellectual disability due to glutamate ionotropic receptor AMPA type subunit 3 mutations |
| 783703004       | White matter hypoplasia corpus callosum agenesis intellectual disability syndrome                   |
| 787093004       | Developmental delay facial dysmorphism syndrome due to mediator complex subunit 13 like deficiency  |
| 788417006       | Alopecia epilepsy intellectual disability syndrome Moynahan type                                    |
| 816067005       | Diabetes hypogonadism deafness intellectual disability syndrome                                     |
| 838441009       | Mental retardation adducted thumbs shuffling gait aphasia syndrome                                  |
| 840505007       | Down syndrome co-occurrent with leukemoid reaction associated transient neonatal pustulosis         |
| 879919001       | Bilateral megalencephaly                                                                            |
| 879937000       | Alpha-N-acetylgalactosaminidase deficiency type 1                                                   |
| 880065001       | Alpha-N-acetylgalactosaminidase deficiency type 2                                                   |
| 880066000       | Alpha-N-acetylgalactosaminidase deficiency type 3                                                   |
| 880081006       | 12q15 deletion syndrome                                                                             |
| 890118006       | Mowat-Wilson syndrome due to monosomy 2q22                                                          |
| 890123006       | 3p25.3 deletion syndrome                                                                            |
| 890130000       | 9q34 deletion syndrome                                                                              |
| 890221004       | Acrocardiofacial syndrome                                                                           |
| 890285006       | Bilateral frontal polymicrogyria                                                                    |
| 890286007       | Bilateral frontoparietal polymicrogyria                                                             |
| 890433006       | Cockayne syndrome type 1                                                                            |
| 890434000       | Cockayne syndrome type 2                                                                            |
| 1003368009      | Molybdenum cofactor deficiency complementation group B                                              |
| 1003373003      | Microcephaly with simplified gyral pattern                                                          |
| 1003374009      | Microlissencephaly                                                                                  |
| 1003387003      | Molybdenum cofactor deficiency complementation group C                                              |
| 1003389000      | Mosaic 1q duplication                                                                               |
| 1003409002      | Maternal 15q11q13 deletion                                                                          |
| 1010630006      | X-linked complicated corpus callosum dysgenesis                                                     |
| 508171000000105 | Severe learning disability                                                                          |
| 889211000000104 | Specific learning disability                                                                        |
| 931001000000105 | Significant learning disability                                                                     |
| 984661000000105 | Mild learning disability                                                                            |
| 984671000000103 | Moderate learning disability                                                                        |
| 984681000000101 | Profound learning disability                                                                        |

|                  |                                                                                        |
|------------------|----------------------------------------------------------------------------------------|
| 1089701000000100 | Profound intellectual development disorder without impairment of behaviour             |
| 1089701000000100 | Profound intellectual development disorder without impairment of behaviour             |
| 1089711000000100 | Profound intellectual development disorder with significant impairment of behaviour    |
| 1089711000000110 | Profound intellectual development disorder with significant impairment of behaviour    |
| 1089721000000100 | Profound intellectual development disorder with minimal impairment of behaviour        |
| 1089721000000100 | Profound intellectual development disorder with minimal impairment of behaviour        |
| 1089731000000100 | Profound intellectual development disorder with impairment of behaviour                |
| 1089731000000100 | Profound intellectual development disorder with impairment of behaviour                |
| 1089741000000100 | Severe intellectual development disorder without significant impairment of behaviour   |
| 1089741000000110 | Severe intellectual development disorder without significant impairment of behaviour   |
| 1089751000000100 | Severe intellectual development disorder with significant impairment of behaviour      |
| 1089751000000110 | Severe intellectual development disorder with significant impairment of behaviour      |
| 1089761000000100 | Severe intellectual development disorder with minimal impairment of behaviour          |
| 1089761000000110 | Severe intellectual development disorder with minimal impairment of behaviour          |
| 1089771000000100 | Severe intellectual development disorder with impairment of behaviour                  |
| 1089771000000100 | Severe intellectual development disorder with impairment of behaviour                  |
| 1089781000000100 | Moderate intellectual development disorder without significant impairment of behaviour |
| 1089791000000100 | Moderate intellectual development disorder with significant impairment of behaviour    |
| 1089791000000100 | Moderate intellectual development disorder with significant impairment of behaviour    |
| 1089811000000100 | Moderate intellectual development disorder with minimal impairment of behaviour        |
| 1089811000000100 | Moderate intellectual development disorder with minimal impairment of behaviour        |
| 1089821000000100 | Moderate intellectual development disorder with impairment of behaviour                |

|                  |                                                                                    |
|------------------|------------------------------------------------------------------------------------|
| 1089821000000110 | Moderate intellectual development disorder with impairment of behaviour            |
| 1089831000000100 | Mild intellectual development disorder without significant impairment of behaviour |
| 1089831000000100 | Mild intellectual development disorder without significant impairment of behaviour |
| 1089841000000100 | Mild intellectual development disorder with significant impairment of behaviour    |
| 1089841000000100 | Mild intellectual development disorder with significant impairment of behaviour    |
| 1089851000000100 | Mild intellectual development disorder with minimal impairment of behaviour        |
| 1089851000000100 | Mild intellectual development disorder with minimal impairment of behaviour        |
| 1093991000000100 | Mild intellectual development disorder with impairment of behaviour                |
| 1093991000000100 | Mild intellectual development disorder with impairment of behaviour                |
| 1094001000000100 | Intellectual development disorder without significant impairment of behaviour      |
| 1094001000000110 | Intellectual development disorder without significant impairment of behaviour      |
| 1094011000000100 | Intellectual development disorder with significant impairment of behaviour         |
| 1094011000000110 | Intellectual development disorder with significant impairment of behaviour         |
| 1094021000000100 | Intellectual development disorder with minimal impairment of behaviour             |
| 1094021000000100 | Intellectual development disorder with minimal impairment of behaviour             |
| 1094031000000100 | Intellectual development disorder with impairment of behaviour                     |
| 1239331000000100 | Significant intellectual disability                                                |
